# Supplementary material
Source: PubMed Central journal article supplement (PMC6761505)
Supplement: AAC.00556-19-s0001.pdf [file AAC.00556-19-s0001.pdf]

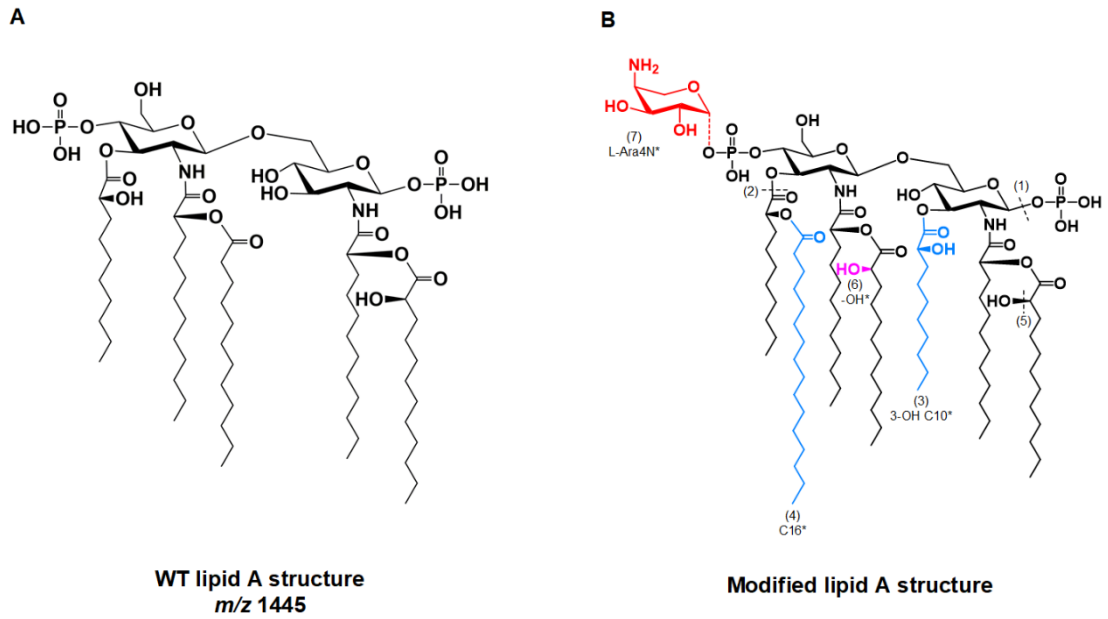

- 1 **Figure S1** Structural analysis of lipid A from *P. aeruginosa*. (A) The structure of WT
- 2 lipid A (*m/z* 1445) represents a bisphosphorylated, penta-acylated lipid A molecule on
- 3 the fatty acyl chain. (B) Different lipid A component modifications, including
- 4 dephosphorylation (-PO<sub>3</sub>), deacylation (-3-OH C10), acylation (+3-OH C10),
- 5 palmitoylation (+C16), dehydroxylation (-OH), hydroxylation (+OH) and
- 6 glycosylation (+L-Ara4N).

7 **Table S1.** primers used in this study.

| Gene                   | Sequence (5'→3')                                                  | Amplicon size (bp) | Reference  |
|------------------------|-------------------------------------------------------------------|--------------------|------------|
| Primers for sequencing |                                                                   |                    |            |
| <i>pmrAB</i>           | F: TCACTGAAACGAGGCTGCCATGAG<br>R: CCAATGCGCAGGCTATCAGATATGT       | 2138               | This study |
| <i>phoP</i>            | F: CGCCATATGAAACTGCTGGTAGTGGAA<br>R: CGCCTCGAGCCGGCAGCGCTCGGTGAA  | 690                | This study |
| <i>phoQ</i>            | F: CGGCATATGATCCGTTCCCTGCGCATC<br>R: CGGCTCGAGGACTGTAGCGAAACGTATG | 1359               | This study |
| <i>oprH</i>            | F: CGGCATATGAAAGCACTCAAGACTCTC<br>R: CGGCTCGAGGAACTTGTAGTTGGCGCC  | 615                | This study |
| <i>parR</i>            | F: GCATATAATGCCAGCCGATT<br>R: ACCACCAGCAGGTTCTTGTC                | 1055               | (1)        |
| <i>parS</i>            | F: CTATTCGCTGGTGGAAAAGC<br>R: GTTAAGCCTCCGCTGTCAAC                | 1162               | (1)        |
| <i>cprR</i>            | F: CGCAGTATCCGAAGGAAGAA<br>R: CCCTTCCTCTTCCATCATCA                | 1154               | (1)        |
| <i>cprS-1</i>          | F: TCTGATCCATAACCCTGCACA<br>R: CTGTTCCCTCGAGCAGTTCCT              | 1002               | (1)        |
| <i>cprS-2</i>          | F: ACCTGGATCGTCACCCTGT<br>R: TCTTCTCGGCGATCAAGTTC                 | 1044               | (1)        |
| <i>colR</i>            | F: GCGAAGGAGTGGGACATGCGA<br>R: CGAGGCTCTGCTTATACTCC               | 710                | This study |
| <i>colS</i>            | F: CTTGCTGCATACGGTGCATG<br>R: TGAATTTTTTCGTCAAGCAAC               | 1307               | This study |
| Primers for qRT-PCR    |                                                                   |                    |            |
| <i>rspL</i>            | F: GTGGTGAAGGTCACAACCTG<br>R: CCTGCTTACGGTCTTTGACA                | 135                | (2)        |
| <i>pmrA</i>            | F: CACCAGGTGACCCTGTCC<br>R: CGTAGAGGCTCTGCTCCAGT                  | 124                | (2)        |
| <i>phoP</i>            | F: TCTACCGGGTCAGCGAATAC<br>R: GATCAGGATCGGGAAGGACT                | 122                | (2)        |
| <i>pmrH</i>            | F: GTTCGTCAGCGACGACAGT<br>R: AAACCGGGCTCGATAACTTC                 | 129                | (2)        |
| <i>parR</i>            | F: AGAATGGTCTGCAGGTGTGC<br>R: CGGCTTGATCACGTAGTCGT                | 134                | (2)        |
| <i>cprR</i>            | F: CGCCTGGAAGATCCTTGAGT<br>R: CACGTTGAGGGTGTTGCTTT                | 115                | (2)        |

9 **Table S2.** Lipid A species detected for the colistin resistant strains (n=2) and hetero-resistant strains (n=9)

| Strain | WT       |          | WT        | WT       | WT       | WT       |
|--------|----------|----------|----------|----------|----------|----------|----------|----------|----------|----------|-----------|----------|----------|----------|
|        | -3OH C10 | WT       | WT       | WT       |          | WT       | -PO3     | WT       | +4-OH    | +3-OH    | +2-OH     | WT       | +2-OH    | +3-OH    |
|        | -PO3     | -3OH C10 | -PO3     | -OH      |          | +OH      | +Ara4N   | +Ara4N   | C10      | C10      | C10       | +C16     | +Ara4N   | +Ara4N   |
|        | m/z 1195 | m/z 1274 | m/z 1366 | m/z 1429 | m/z 1445 | m/z 1461 | m/z 1496 | m/z 1576 | m/z 1600 | m/z 1616 | m/z 1632  | m/z 1684 | m/z 1731 | m/z 1747 |
| PAO1   | /        | /        | 10.6±2.8 | 20.6±4.4 | 100±0.0  | 8.4±2.3  | /        | /        | /        | 14.4±2.2 | /         | /        | /        | /        |
| CST-FR |          |          |          |          |          |          |          |          |          |          |           |          |          |          |
| TL1671 | /        | /        | 14.2±3.1 | 23.4±3.6 | 100±0.0  | 14.9±1.1 | 30±0.5   | 14.9±2.2 | 9.0±1.7  | 31.0±2.8 | 6.1±0.4   | /        | /        | 3.5±0.2  |
| TL2204 | /        | /        | 18.3±7.8 | 42.5±1.5 | 100±0.0  | 10.0±0.7 | 5.4±1.7  | /        | 4.0±0.8  | 14.3±2.2 | /         | /        | /        | /        |
| CST-HR |          |          |          |          |          |          |          |          |          |          |           |          |          |          |
| TL1722 | SP       | 3.7±2.9  | /        | 6.4±2.5  | 20.8±1.8 | 100±0.0  | 6.73±4.3 | /        | /        | /        | 7.3±0.8   | /        | /        | /        |
|        | RSP      | /        | /        | 5.0±0.1  | 10.5±1.5 | 100±0.0  | 10.4±1.2 | 8.5±1.6  | 15.9±3.7 | 11.5±2.4 | 8.3±1.8   | /        | 5.1±0.8  | 8.0±0.5  |
| TL1736 | SP       | /        | /        | 21.3±1.1 | 49.7±4.4 | 100±0.0  | 10.2±0.4 | /        | /        | 2.8±0.1  | 15.8±0.2  | 1.6±0.0  | 2.2±0.1  | /        |
|        | RSP      | /        | /        | 3.8±0.8  | 16.6±0.9 | 100±0.0  | 7.7±0.7  | 9.3±2.7  | 10.3±2.4 | /        | 26.8±2.4  | 5.3±1.9  | /        | 3.0±0.6  |
| TL1744 | SP       | /        | /        | 10.3±1.9 | 10.3±2.5 | 100±0.0  | 6.5±2.3  | /        | /        | /        | 3.5±0.6   | /        | 2.5±0.1  | /        |
|        | RSP      | /        | /        | 8.9±1.6  | 27.4±3.1 | 100±0.0  | 7.9±0.8  | /        | /        | /        | 6.4±1.4   | /        | /        | 5.4±1.2  |
| TL2294 | SP       | /        | /        | /        | 15.5±1.9 | 100±0.0  | 9.3±1.1  | /        | /        | 8.6±3.2  | 7.2±0.3   | /        | /        | /        |
|        | RSP      | 10.2±1.8 | 11.0±0.7 | 3.7±5.2  | 22.7±2.2 | 100±0.0  | 10.9±0.1 | /        | 13.3±1.1 | 8.8±1.0  | 80.1±17.5 | 11.2±2.0 | /        | 5.9±2.0  |
| TL2314 | SP       | /        | /        | 10.4±1.0 | 24.5±1.6 | 100±0.0  | 7.5±0.8  | /        | /        | /        | 21.7±0.4  | /        | /        | /        |
|        | RSP      | /        | /        | /        | 7.0±0.2  | 100±0.0  | 9.5±0.2  | 3.9±0.9  | 10.6±0.3 | 1.9±1.7  | 25.9±0.9  | 3.1±0.7  | /        | 2.6±0.6  |
| TL2917 | SP       | 11.7±0.2 | 6.5±0.3  | 8.5±1.0  | 36.0±0.4 | 100±0.0  | 11.8±0.5 | /        | /        | /        | 10.8±0.9  | /        | /        | /        |
|        | RSP      | /        | /        | /        | 23.9±2.5 | 100±0.0  | 8.6±2.7  | 11.1±1.7 | 5.7±1.6  | /        | 12.8±0.4  | /        | /        | 2.8±0.9  |

|        |     |   |         |          |          |         |          |   |          |         |          |           |   |   |         |
|--------|-----|---|---------|----------|----------|---------|----------|---|----------|---------|----------|-----------|---|---|---------|
| TL2967 | SP  | / | /       | 3.5±0.3  | 41.5±0.9 | 100±0.0 | 15.5±0.2 | / | /        | 3.5±0.3 | 18.4±0.6 | 2.5±0.3   | / | / | /       |
|        | RSP | / | /       | /        | 8.0±4.2  | 100±0.0 | 19.7±1.9 | / | 20.2±3.0 | /       | 17.6±1.0 | /         | / | / | /       |
| TL3008 | SP  | / | 4.9±1.1 | 14.6±0.8 | 27.1±0.8 | 100±0.0 | 15.6±0.4 | / | /        | 5.4±0.5 | 32.4±3.6 | 22.4±23.7 | / | / | /       |
|        | RSP | / | /       | /        | 9.5±0.1  | 100±0.0 | 29.6±0.6 | / | 19.7±2.4 | /       | 31.3±2.6 | 9.8±0.6   | / | / | 5.2±0.9 |
| TL3086 | SP  | / | 2.3±0.9 | 13.8±5.1 | 25.1±0.0 | 100±0.0 | 17.3±0.4 | / | /        | 2.3±0.1 | 23.7±0.5 | 3.6±0.2   | / | / | /       |
|        | RSP | / | /       | /        | 10.2±1.2 | 100±0.0 | 30.6±1.7 | / | 14.0±1.4 | /       | 29.8±2.6 | 11.8±2.0  | / | / | 6.2±1.0 |

10 Values represent mean ± SD of the relative peak intensities. Every strain was conducted in triplicate by MALDI-TOF MS;

11 CST-FR, colistin fully-resistant isolates; CST-HR, colistin hetero-resistant isolates; SP, susceptible populations; HSP, hetero-resistant

12 subpopulations.

13 <sup>a</sup> "/" represents ion relative intensity <1.0 or not detected.

14 **Table S3** Frequencies of mutations in two colistin-resistant and nine colistin-hetero-  
 15 resistant *P. aeruginosa*.

| Isolates      | Frequencies of mutation to rifampicin<br>(300 µg/ml) resistance | Mutator phenotype <sup>a</sup> |
|---------------|-----------------------------------------------------------------|--------------------------------|
| PAO1          | $1.44 \times 10^{-10}$                                          | /                              |
| TL1671        | $2.41 \times 10^{-10}$                                          | -                              |
| TL2204        | $1.05 \times 10^{-10}$                                          | -                              |
| TL1722        | $2.30 \times 10^{-10}$                                          | -                              |
| <b>TL1736</b> | <b><math>1.52 \times 10^{-6}</math></b>                         | +                              |
| TL1744        | $2.00 \times 10^{-9}$                                           | -                              |
| TL2294        | $7.20 \times 10^{-10}$                                          | -                              |
| <b>TL2314</b> | <b><math>2.20 \times 10^{-6}</math></b>                         | +                              |
| <b>TL2917</b> | <b><math>7.78 \times 10^{-6}</math></b>                         | +                              |
| <b>TL2967</b> | <b><math>1.67 \times 10^{-8}</math></b>                         | +                              |
| <b>TL3008</b> | <b><math>9.10 \times 10^{-9}</math></b>                         | +                              |
| TL3086        | $1.25 \times 10^{-9}$                                           | -                              |

16 <sup>a</sup> The strain was considered a mutator phenotype when the mutation frequency  
 17 conferring rifampicin resistance was at least 20-fold higher than that observed for the  
 18 wild-type strain PAO1.

19

## 20 **References**

21 1. Lee JY, Chung ES, Na IY, Kim H, Shin D, Ko KS. 2014. Development  
 22 of colistin resistance in *pmrA*-, *phoP*-, *parR*- and *cprR*-inactivated mutants

23 of *Pseudomonas aeruginosa*. J Antimicrob Chemother 69:2966-2971.

24 2. Lee JY, Ko KS. 2014. Mutations and expression of PmrAB and PhoPQ

25 related with colistin resistance in *Pseudomonas aeruginosa* clinical isolates.

26 Diagn Microbiol Infect Dis 78:271-276.
